# Supplementary material
Source: PubMed Central journal article supplement (PMC2861779)
Supplement: NIHMS196280-supplement-1.pdf [file NIHMS196280-supplement-1.pdf]

Supplementary Online Material

Figure S1. Scatterplots and linear trends for the association between participants' well-being and aspects of their daily interactions; Panel A: Percentage of time per day spent alone and talking to others; Panel B: Percentage of conversations that were small-talk and substantive conversations.

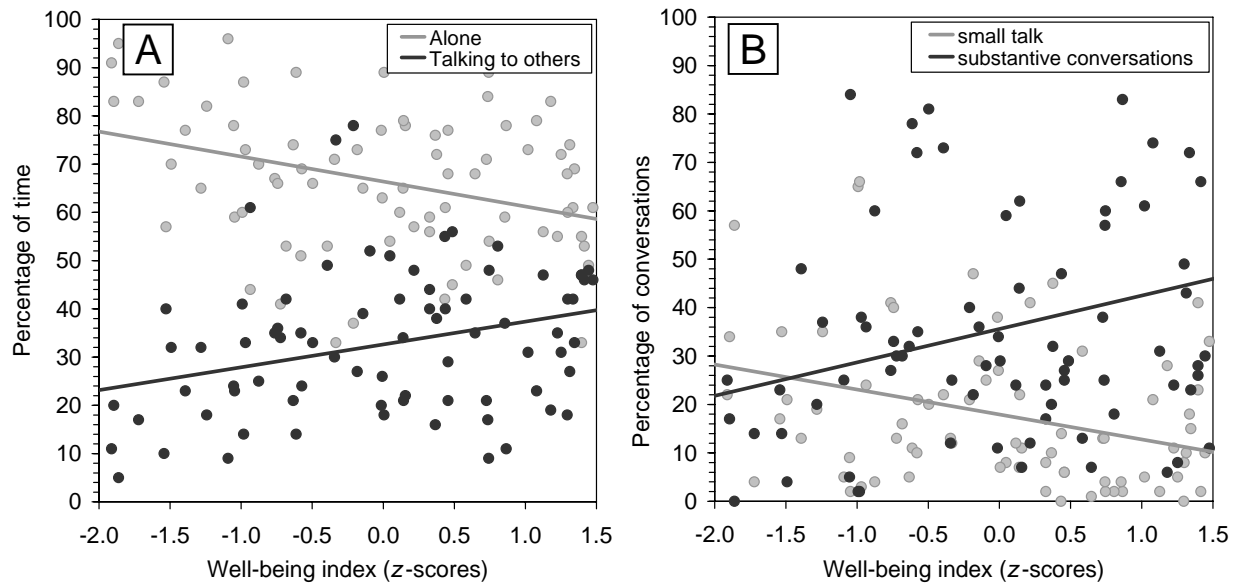

Note:  $N = 79$ ; the z-scores for the well-being index ranged from  $z = -2.02$  to  $z = +1.57$ ; for ease of graphical presentation, two data points outside of the depicted  $[-2.0; 1.5]$  range are omitted.
